# Supplementary material for: [Cu(N^N)(P^P)]+complexes with 2,2′:6′,2′′-terpyridine ligands as the N^N domain
Source: Royal Society of Chemistry journal article supplement (doi:10.1039/c5dt00517e), 2015-01-01
Supplement: c5dt00517e1.pdf [file c5dt00517e1.pdf]

ESI to accompany:

## **[Cu(N<sup>^</sup>N)(P<sup>^</sup>P)]<sup>+</sup> complexes with 2,2':6',2''-terpyridine ligands as the N<sup>^</sup>N domain**

Niamh S. Murray,<sup>a</sup> Sarah Keller,<sup>a</sup> Edwin C. Constable,<sup>a</sup> Catherine E. Housecroft,<sup>\*a</sup> Markus Neuburger<sup>a</sup> and Alessandro Prescimone<sup>a</sup>

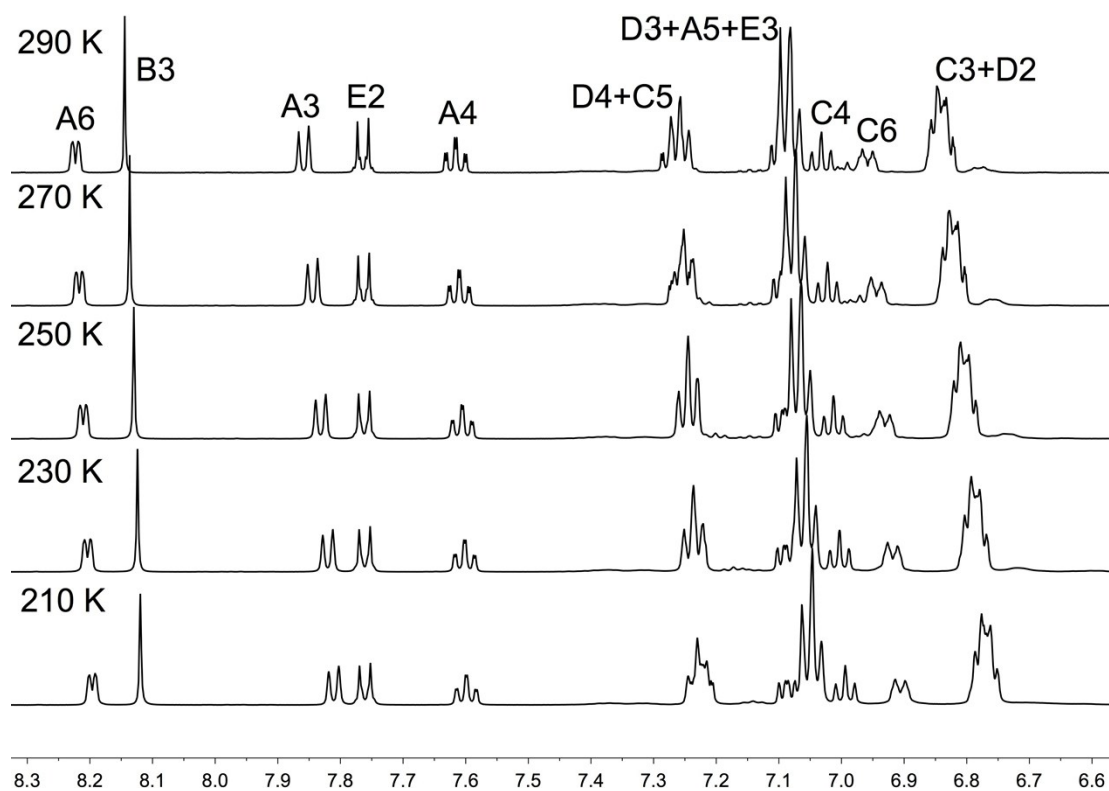

Fig. S1. Variable temperature 500 MHz <sup>1</sup>H NMR spectra of [Cu(**4**)(POP)][PF<sub>6</sub>] (in CD<sub>2</sub>Cl<sub>2</sub>; aromatic region only). Chemical shifts in  $\delta$  / ppm.

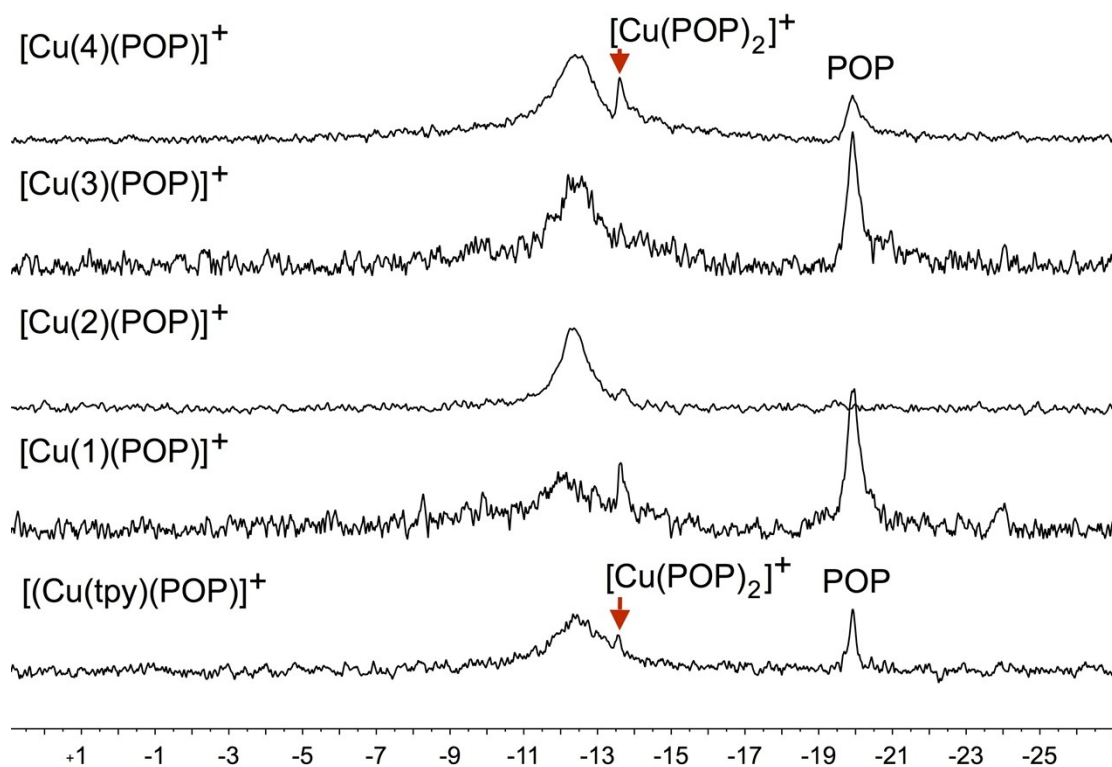

Fig. S2.  $^{31}\text{P}$  NMR spectra of aged samples of  $[\text{Cu}(\text{N}^{\wedge}\text{N})(\text{POP})][\text{PF}_6]$  ( $\text{N}^{\wedge}\text{N} = \text{tpy}, \mathbf{1}-\mathbf{4}$ ) in  $\text{CD}_2\text{Cl}_2$ , or  $\text{CDCl}_3$  for  $[\text{Cu}(\mathbf{2})(\text{POP})][\text{PF}_6]$ . Each spectrum also shows a septet for the  $[\text{PF}_6]^-$  ion at  $\delta -144.5$  ppm. Scale in  $\delta$  / ppm.
